# Supplementary material for: Reduction of nitrite to NO in an organised triphasic medium by platinum carbonyl clusters and redox active dyes as electron carriers
Source: Royal Society of Chemistry journal article supplement (doi:10.1039/b703352d), 2007-01-01
Supplement: b703352d.pdf [file b703352d.pdf]

# Electronic Supplementary Information (ESI)

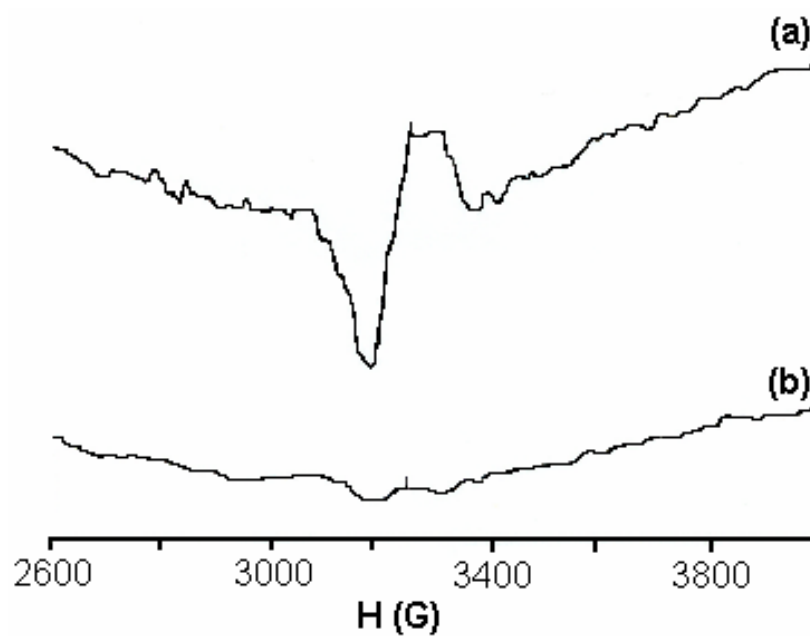

**Fig. S1.** ESR spectra (in  $\text{CH}_2\text{Cl}_2$  at 77 K) of a  $[\text{Co}(\text{Salen})]$  solution (a) before and (b) after passing the effluent gas. The initial paramagnetic  $[\text{Co}(\text{Salen})]$  complex turns diamagnetic  $[(\text{NO})\text{Co}(\text{Salen})]$  after bonding with NO.

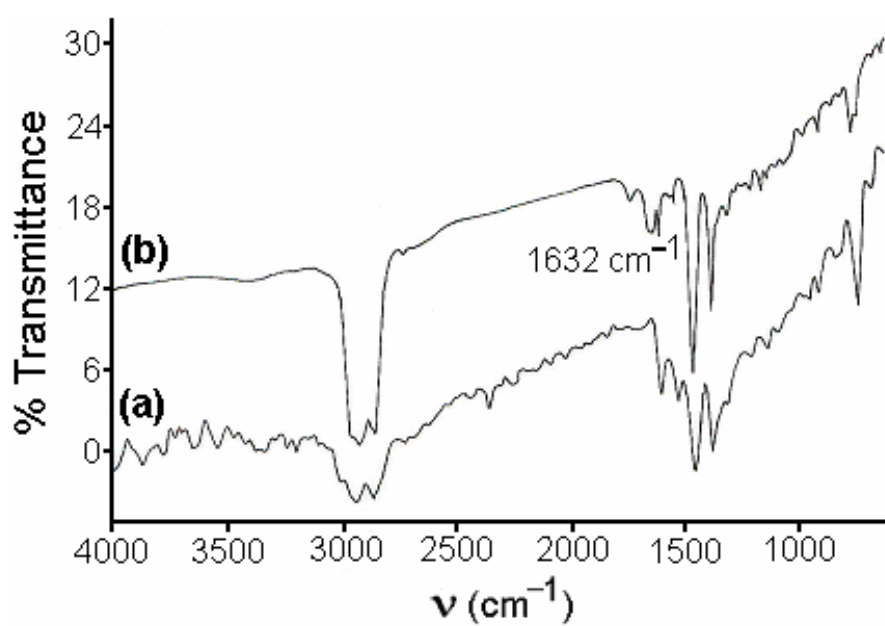

**Fig. S2.** IR spectra of (a) [Co(Salen)] and (b) [(NO)Co(Salen)] in Nujol mull.  $\nu_{\text{NO}} = 1632 \text{ cm}^{-1}$  in (b) indicates Co–NO bond formation.

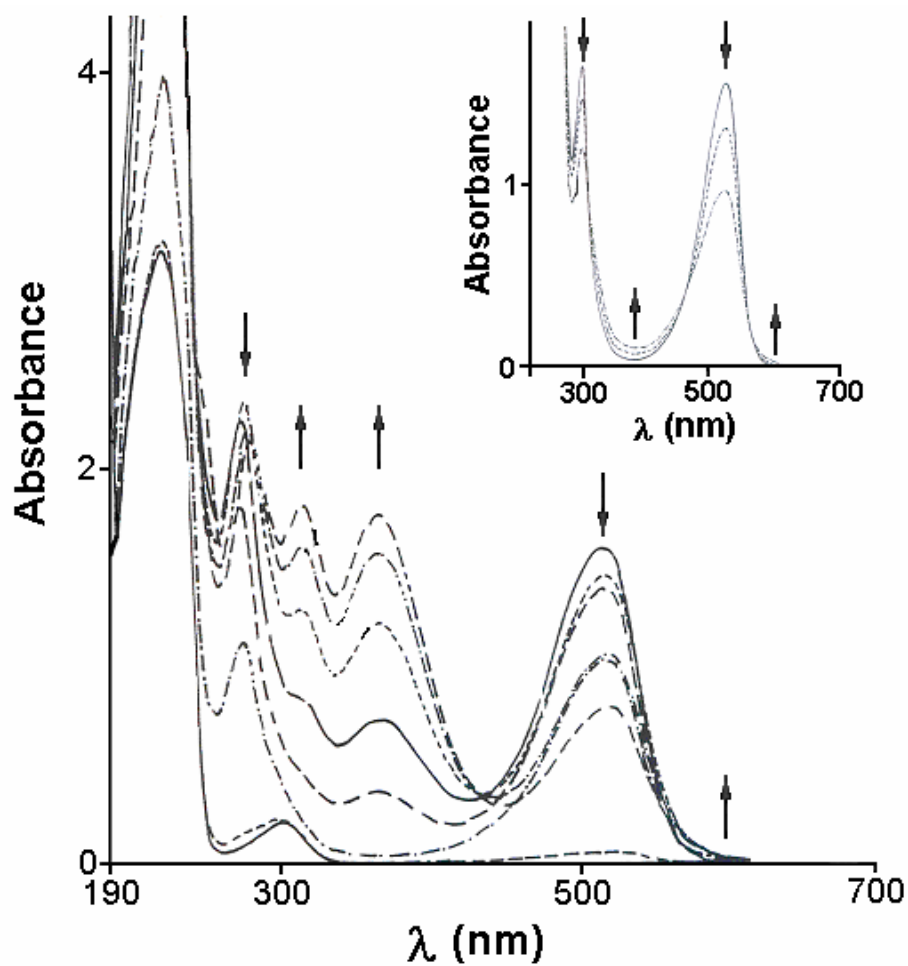

**Fig. S3.** UV-Visible spectrophotometric monitoring of the reduction of  $\text{NO}_2^-$  by SafH in water.

The initial period ( $\sim 0.5$  h) shows isobesticity (inset).
